# Supplementary material for: Atomically dispersed Ru doped on IrOx sub-nanoclusters for enhanced oxygen evolution reaction in acidic media
Source: Royal Society of Chemistry journal article supplement (doi:10.1039/d4ta01998a), 2024-01-01
Supplement: d4ta01998a1.pdf [file d4ta01998a1.pdf]

## Supporting information

### Atomically dispersed Ru doped in IrO<sub>x</sub> nano clusters for the enhanced oxygen evolution reaction in acidic media

Yan Dong,<sup>1,2,3</sup> Yanle Li,<sup>1,5</sup> Yichao Lin,<sup>\*1,2</sup> Anyang Chen,<sup>1</sup> Mengting Deng,<sup>1</sup> Linjuan Zhang,<sup>4</sup> Ziqi Tian,<sup>\*1,2</sup> and Liang Chen<sup>\*1,2</sup>

1. Key Laboratory of Advanced Fuel Cells and Electrolyzers Technology of Zhejiang Province, Ningbo Institute of Materials Technology and Engineering, Chinese Academy of Sciences, Ningbo, Zhejiang 315201, P.R. China
2. University of Chinese Academy of Sciences, Beijing 100049, P.R. China
3. School of Materials Science and Engineering, Hainan University, Haikou 570228, P. R. China
4. Key Laboratory of Interfacial Physics and Technology, Shanghai Institute of Applied Physics, Chinese Academy of Sciences, Shanghai 201800, P. R. China
5. Yangtze Delta Region Institute (Huzhou), University of Electronic Science and Technology of China, Huzhou, Zhejiang 313000, P. R. China

E-mail: yclin@nimte.ac.cn, tianziqi@nimte.ac.cn, chenliang@nimte.ac.cn

## EXPERIMENTAL METHODS

**Chemicals.** All chemicals were analytical grade and used without further purification. Ruthenium chloride hydrate ( $\text{RuCl}_3 \cdot x\text{H}_2\text{O}$ ), Iridium chloride hydrate ( $\text{IrCl}_3 \cdot x\text{H}_2\text{O}$ ), formic acid (99%) and 1-Methyl-2-pyrrolidinone (NMP) were purchased from Aladdin Chemical Reagent limited corporation. Carbon paste was purchased from BAS incorporate. The deionized (DI) water used throughout all experiments was purified through a Millipore system.

**Synthesis of Ir clusters.**  $\text{IrCl}_3 \cdot x\text{H}_2\text{O}$  (30 mg) was dispersed in 5 mL formic acid. Then, the above solution was mixed with 15 mL NMP. After agitated stirring for 30 min, the mixed solution was transferred into 50 mL Teflon stainless steel and heated at 100 °C for 5 h. After that, the black precipitated was collected and washed three times with ethanol, and dried in an oven at 60 °C overnight.

**Synthesis of Ru-IrO<sub>x</sub> clusters.**  $\text{IrCl}_3 \cdot x\text{H}_2\text{O}$  (30 mg) and  $\text{RuCl}_3 \cdot x\text{H}_2\text{O}$  (30 mg) were dispersed in 5 mL formic acid. Then, the above solution was mixed with 15 mL NMP. After agitated stirring for 30 min, the mixed solution was transferred into 50 mL Teflon stainless steel and heated at 100 °C for 5 h. After that, the black precipitated was collected and washed three times with ethanol, and dried in an oven at 60 °C overnight.

**Electrocatalytic OER measurements.** In a typical procedure, 4 mg of Ru-IrO<sub>x</sub> clusters and 4 mg carbon paste were mixed and grinded for 20 min. Then, the mixtures were added to 1 ml of water/ethanol (3:1, v/v) containing 15 μL Nafion solution (5 %, Sigma-Aldrich). After the mixtures were sonicated for 30 min, 200 μL catalyst ink was dipped on a carbon paper (1x1 cm) and dried at room temperature. A three-electrode set-up was used for electrocatalytic OER measurements. A platinum mesh was used as the counter electrode, while a saturated Hg/Hg<sub>2</sub>SO<sub>4</sub> electrode after calibrated in H<sub>2</sub>-saturated 0.5 M H<sub>2</sub>SO<sub>4</sub> solution was used as reference electrode. The potential difference between the Hg/Hg<sub>2</sub>SO<sub>4</sub> reference electrode and reversible hydrogen electrode is 0.704 V (Fig. S9). All measurements were performed in 0.5 M H<sub>2</sub>SO<sub>4</sub> solution at room temperature. Cyclic voltammograms (CVs) tests were collected at a scan rate of 50 mV/s typically between 1.004 and 1.504 V vs. RHE (Fig. S10). Linear

sweep voltammetry (LSV) curves were collected at a scan rate of 5 mV/s from 1.204 and 1.704 V. Chronopotentiometric measurements were carried out at applying constant current (10 mA cm<sup>-2</sup>) for up to 150 h. Electrochemical impedance spectroscopy (EIS) were performed at 0.8 V.

**PEM water electrolyzer.** 16 mg of Ru-IrO<sub>x</sub> clusters were dispersed to 4 ml of water/ethanol (3:1, v/v) containing 120 μL Nafion solution (5 %, Sigma-Aldrich). After the mixtures were sonicated for 30 min, the prepared catalyst ink was sprayed on a Nafion 117 membrane (2 x 2 cm) and dried at room temperature. The cathode side was coated with 1 mg cm<sup>-2</sup> of commercial 20 wt % Pt/C (Sigma-Aldrich). Subsequently, MEA and two protected PTFE sheet were hot pressed together at 135 °C for 10 minutes with a pressure of 10 MPa. A carbon fiber paper (Toray H-090, 280 μm) and platinum plated titanium felt (250 μm) work as cathodic and anodic gas diffusion layer, respectively. The tightening force for the assembly of electrolytic cell is 6 N·m. The performance of the single cell was carried out at room temperature with DI water pumped into the anode side.

**Computational Details.** All the spin-polarized density functional theory (DFT) calculations were conducted using the Vienna Ab-initio Simulation Package (VASP) software.<sup>[1]</sup> The exchange-correlation interaction was described with generalized gradient approximation (GGA)-Revised Perdew-Burke-Ernzerhof (RPBE) functional.<sup>[2]</sup> The projected augmented-wave (PAW) method was employed to depict the interaction of ions and electrons.<sup>[3]</sup> The van der Waals interactions was considered with the DFT-D3 method.<sup>[4]</sup> The cutoff energy for the plane-wave-basis set was set as 400 eV. The convergence criteria for energy of electronic self-consistence loops and force of ionic relaxation loops were set as 10<sup>-4</sup> eV and 0.03 eV/Å, respectively. As shown in Fig. S22a, the IrO<sub>2</sub> and RuO<sub>2</sub> slab models are constructed by their (3 × 2) (110) surfaces, which are the most stable rutile-type surfaces<sup>5</sup>. The slab included 12 atomic layers and a 15 Å vacuum layer in the perpendicular direction of the (110) surface to avoid the interaction between adjacent images. The Ru doped IrO<sub>2</sub> is constructed by replacing one coordinately unsaturated Ir atom on the IrO<sub>2</sub>(110) surface,

as exhibited in Fig. S22. The top six atomic layers and adsorbed species were allowed to relax and other atoms were fixed during the geometrical optimization. The k-points to sample the Brillouin zone were set as  $3 \times 2 \times 1$  for optimization and Bader charge analysis, and  $6 \times 4 \times 1$  for density of states (DOS) calculations.

The four-electron process was adopted to investigate the oxygen evolution reaction (OER) mechanism, including the following four elementary steps.<sup>[5]</sup>:

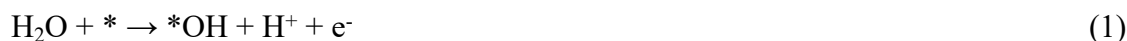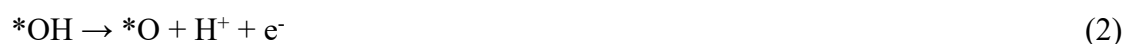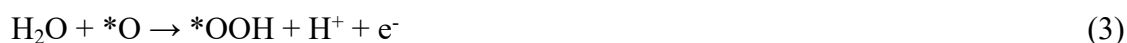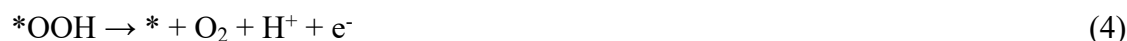

where asterisk (-\*) represent an adsorption site on the surface, and a proton ( $\text{H}^+$ ) and an electron ( $\text{e}^-$ ) transfer took place at each step. The free energy change of each step was computed with the following equations:

$$\Delta G_1 = E(*\text{OH}) - E(*) - E_{\text{H}_2\text{O}} + 1/2E_{\text{H}_2} + (\Delta\text{ZPE}-T\Delta S)$$

$$\Delta G_2 = E(*\text{O}) - E(*\text{OH}) + 1/2E_{\text{H}_2} + (\Delta\text{ZPE}-T\Delta S)$$

$$\Delta G_3 = E(*\text{OOH}) - E(*\text{O}) - E_{\text{H}_2\text{O}} + 1/2E_{\text{H}_2} + (\Delta\text{ZPE}-T\Delta S)$$

$$\Delta G_4 = E(*) - E(*\text{OOH}) + E_{\text{O}_2} + 1/2E_{\text{H}_2} + (\Delta\text{ZPE}-T\Delta S)$$

where  $E(*)$ ,  $E(*\text{OH})$ ,  $E(*\text{O})$  and  $E(*\text{OOH})$  are the computed energies of the surface and the adsorbed  $*\text{OH}$ ,  $*\text{O}$  and  $*\text{OOH}$  species, respectively. The zero point energy and the entropy included in  $\Delta G_1 \sim \Delta G_4$  are taken from the reference.<sup>[6]</sup>

The surface Pourbaix diagram was constructed based on the following electrochemical steps on  $\text{IrO}_2(110)$  surface:

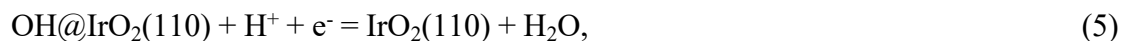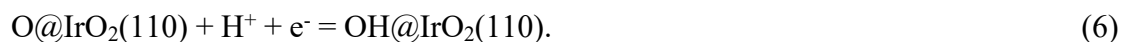

The electromotive forces for equation (1) and (2) were calculated as  $E = -\Delta G/n$ , where  $\Delta G$  was the free energy changes in eV, and  $n$  was the number of electrons transferred in the reaction. To obtain the surface Pourbaix diagram, the relation between applied potential,  $E$ , and pH was analyzed as:

$$E(\text{OH}@ \text{IrO}_2(110)) = E^0(\text{OH}@ \text{IrO}_2(110)/\text{IrO}_2(110)) - 0.059 * \text{pH}, \quad (7)$$

$$E(\text{O}@ \text{IrO}_2(110)) = E^0(\text{O}@ \text{IrO}_2(110)/\text{OH}@ \text{IrO}_2(110)) - 0.059 * \text{pH}. \quad (8)$$

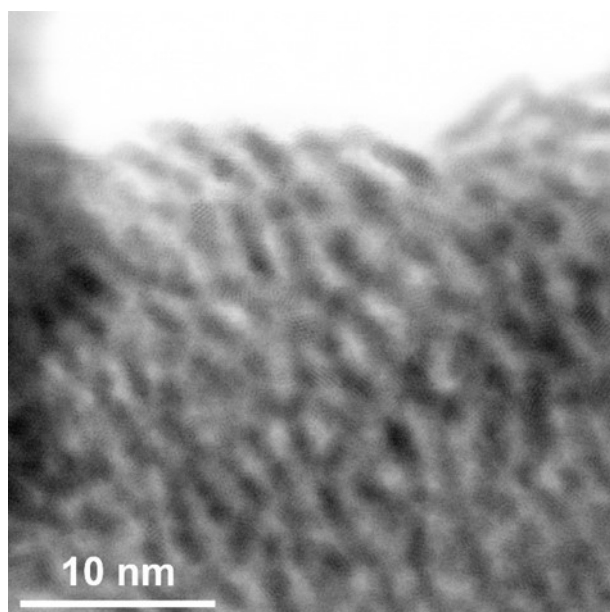

Fig. S1. HRTEM image of Ir clusters.

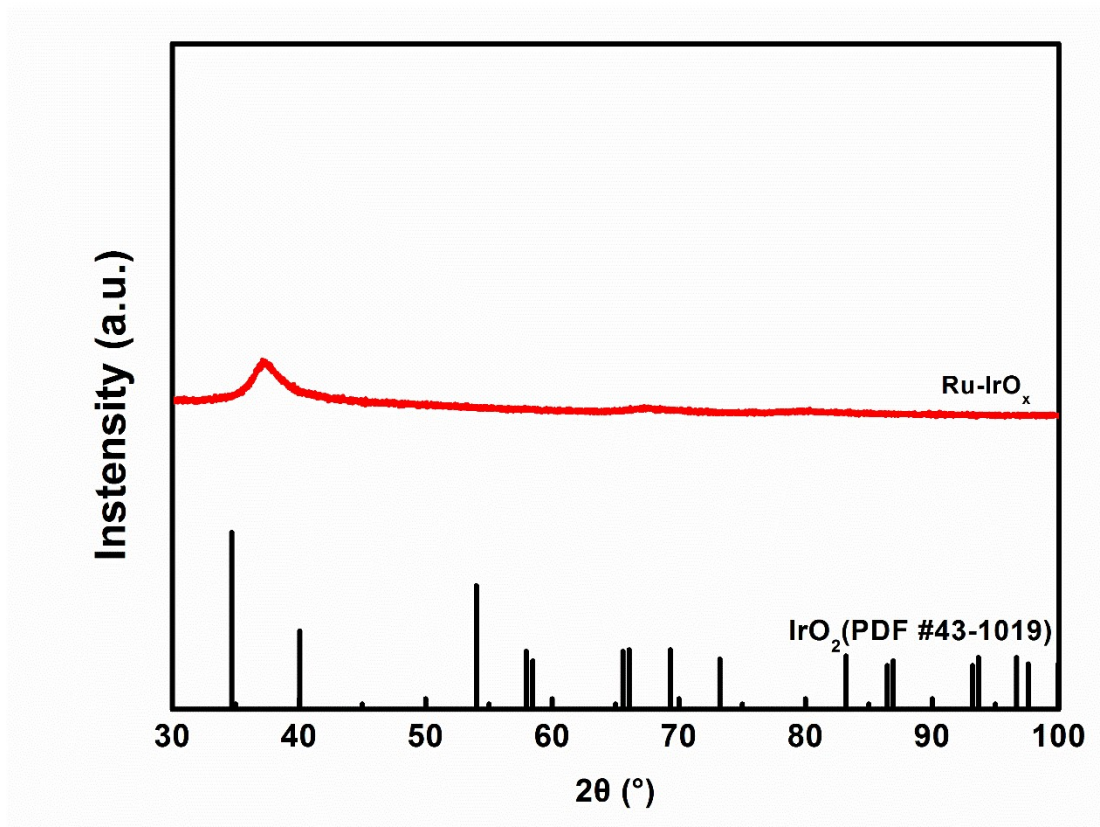

Fig. S2. XRD pattern of Ru-IrO<sub>x</sub>.

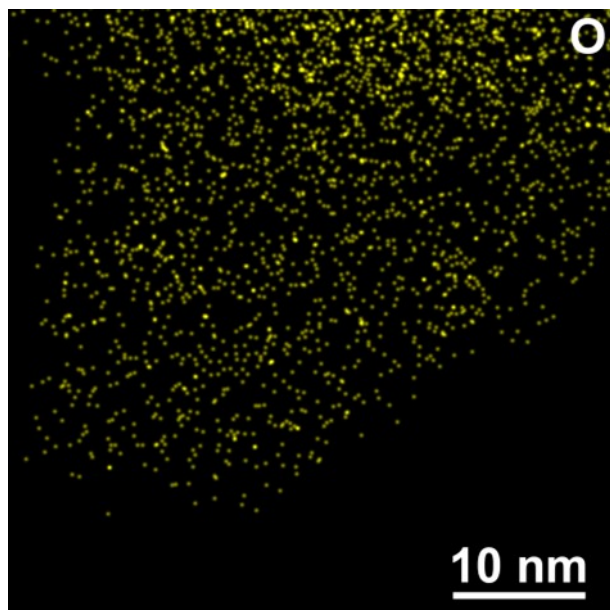

Fig. S3. HAADF-STEM image and corresponding EDS maps of O.

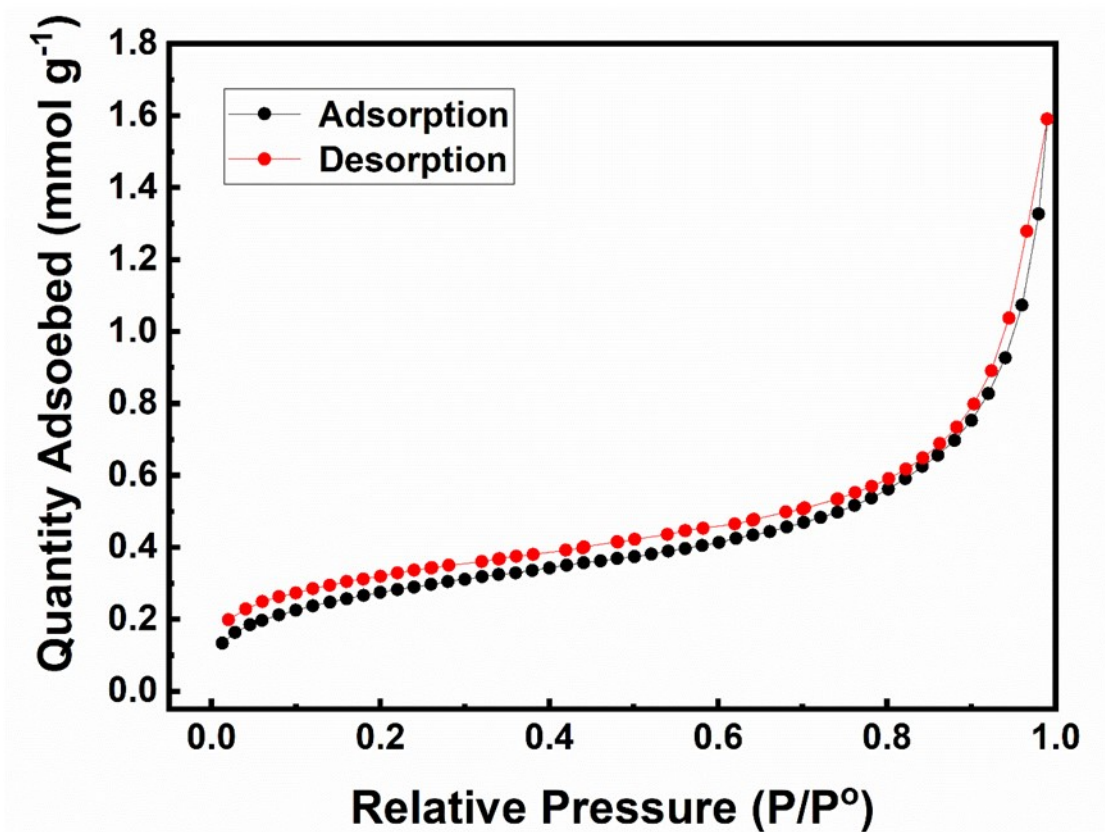

Fig. S4. N<sub>2</sub> adsorption-desorption isotherm of Ru-IrO<sub>x</sub> clusters.



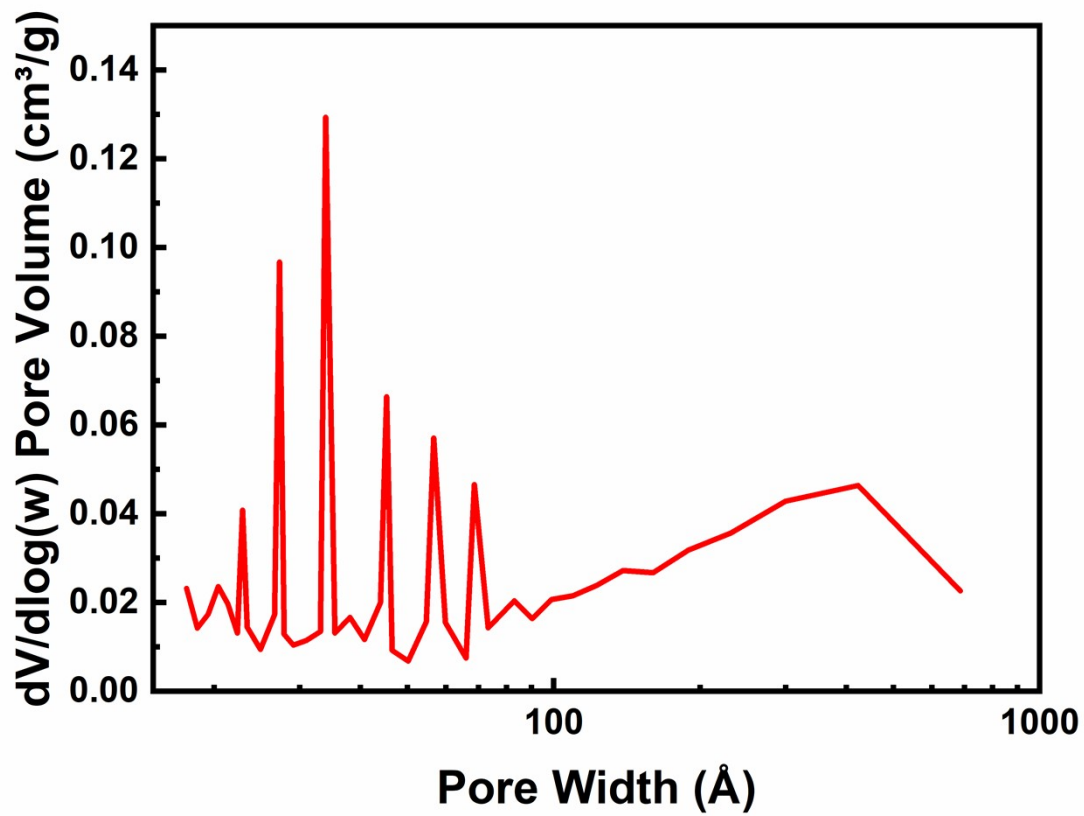

Fig. S5. The micropore size distribution plot of Ru-IrO<sub>x</sub> clusters.

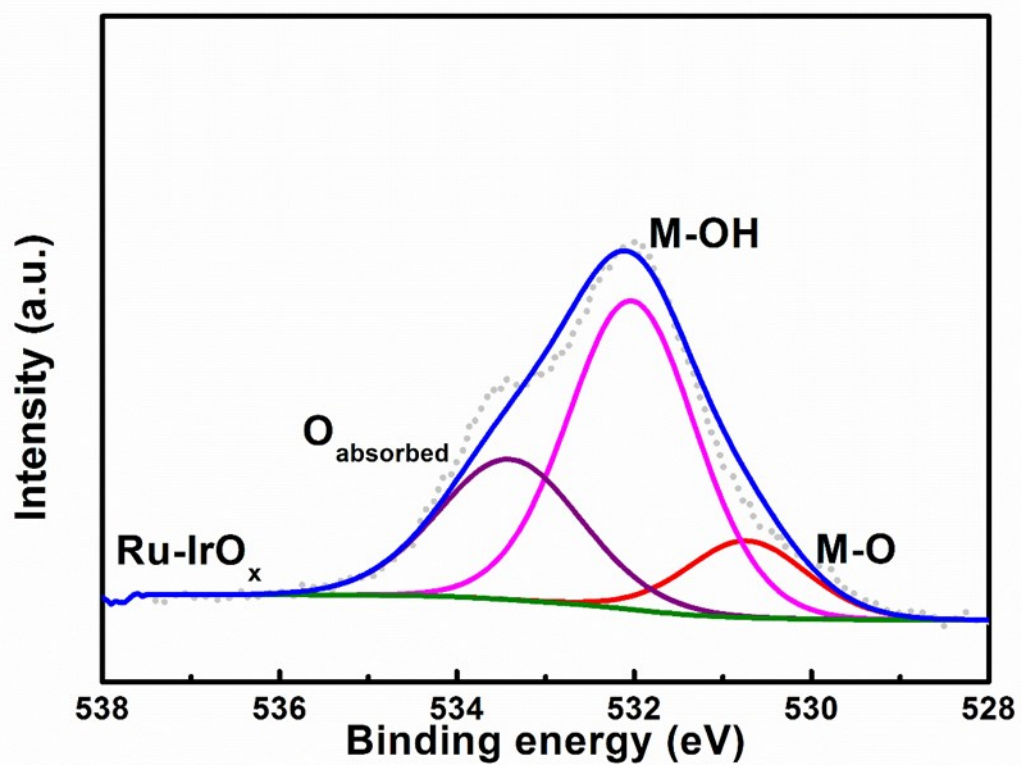

Fig. S6. XPS results of O 2p for Ru-IrO<sub>x</sub> clusters.

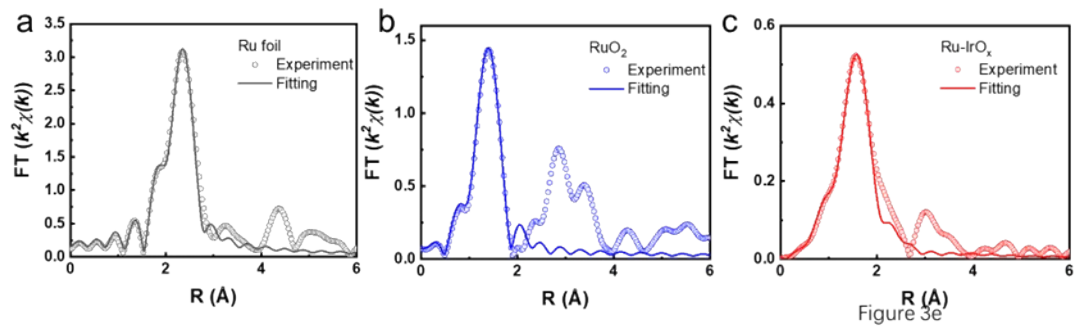

Fig. S7. EXAFS fitting curve for Ru K-edge of Ru foil. b) EXAFS fitting curve for Ru K-edge of RuO<sub>2</sub>. c) EXAFS fitting curve for Ru K-edge of Ru-IrO<sub>x</sub>.

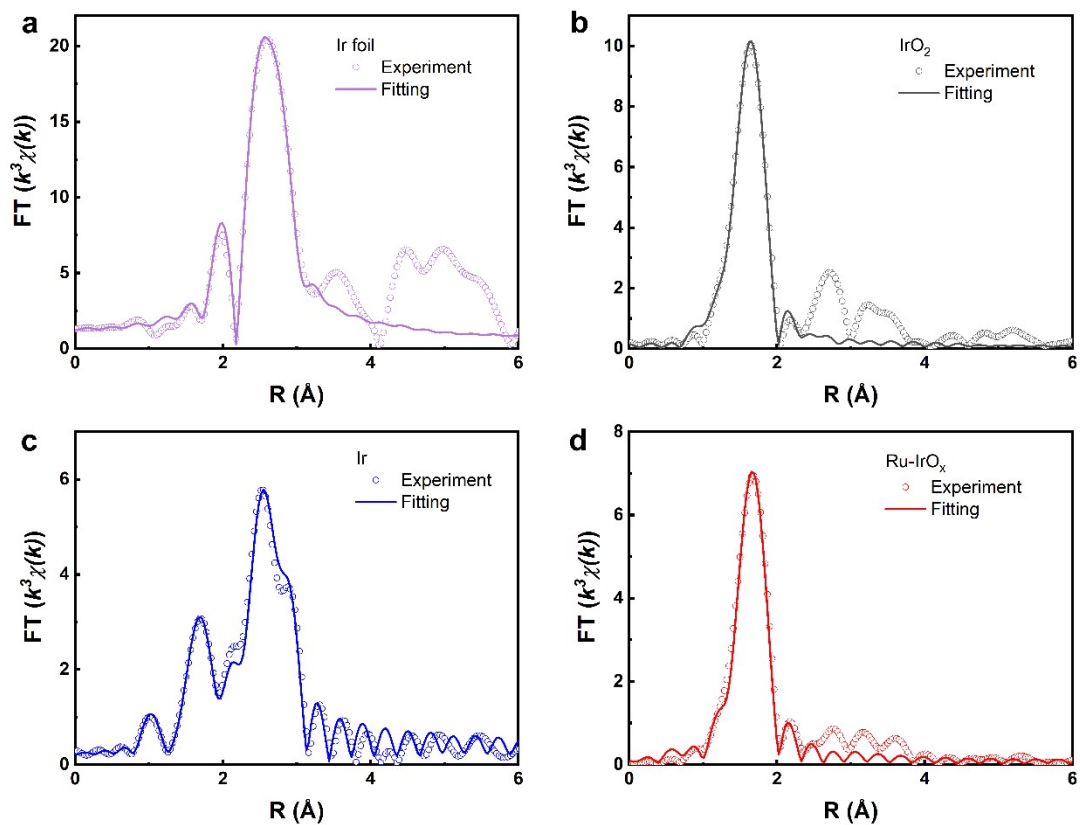

Fig. S8. a) EXAFS fitting curve for Ir L<sub>3</sub>-edge of Ir foil. b) EXAFS fitting curve for Ir L<sub>3</sub>-edge of IrO<sub>2</sub>. c) EXAFS fitting curve for Ir L<sub>3</sub>-edge of Ir clusters. d) EXAFS fitting curve for Ir L<sub>3</sub>-edge of Ru-IrO<sub>x</sub> clusters.

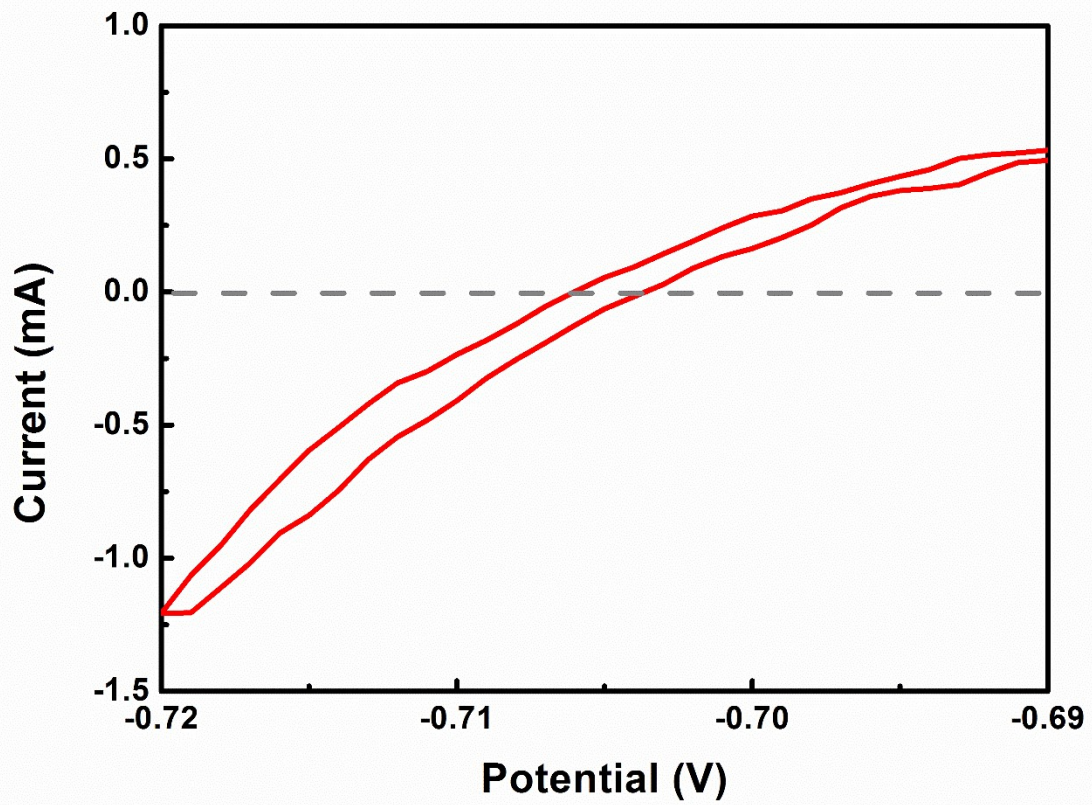

Fig. S9. Calibration of the Hg/HgSO<sub>4</sub> electrode (saturated potassium sulfate) in 0.5 M H<sub>2</sub>SO<sub>4</sub> electrolyte.

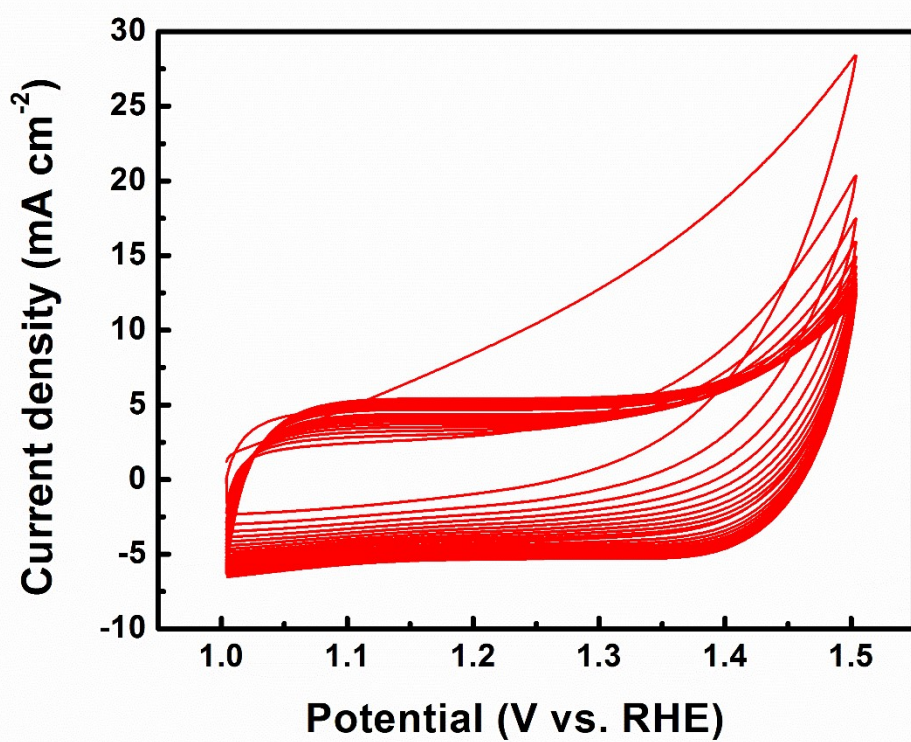

Fig. S10. CV curves of Ru-IrO<sub>x</sub> clusters.

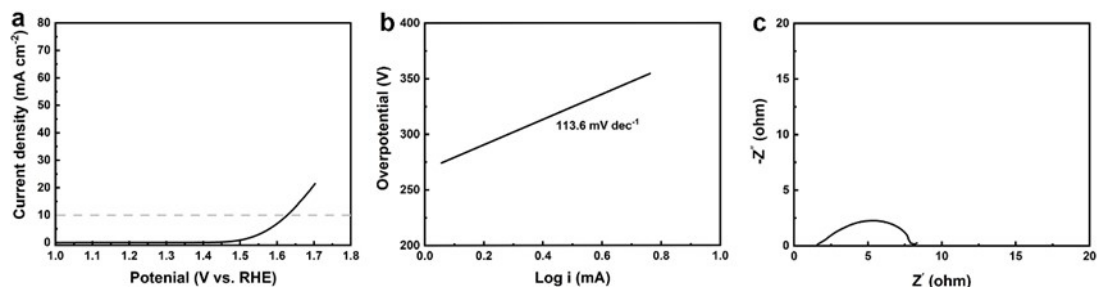

Fig. S11 a) LSV curves of commercial RuO<sub>2</sub> for OER in 0.5 M H<sub>2</sub>SO<sub>4</sub> solution. b) The corresponding Tafel plots of commercial RuO<sub>2</sub> for OER in 0.5 M H<sub>2</sub>SO<sub>4</sub> solution. c) Nyquist plots of commercial RuO<sub>2</sub>.

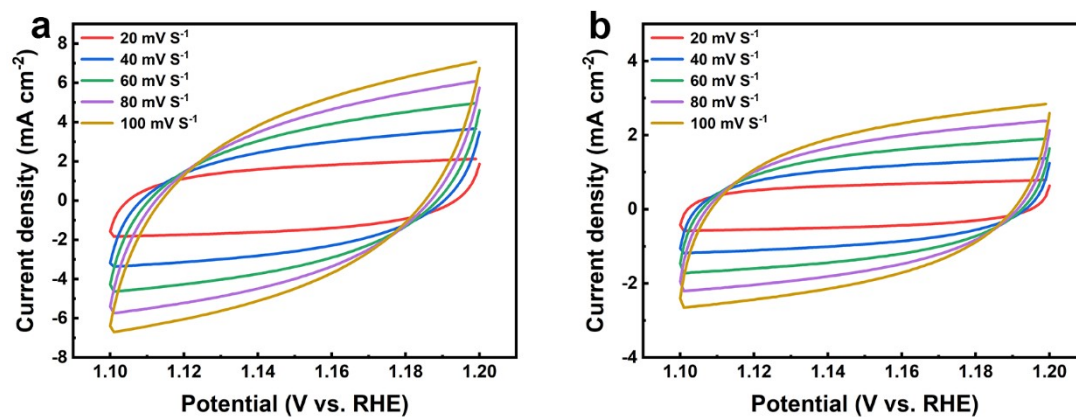

Fig. S12. a) CV curves of Ru-IrO<sub>x</sub> measured in the range of 1.10 to 1.20 vs. RHE with the scan rate from 20 to 100 mV s<sup>-1</sup>. b) CV curves of Ir measured in the range of 1.10 to 1.20 vs. RHE with the scan rate from 20 to 100 mV s<sup>-1</sup>.



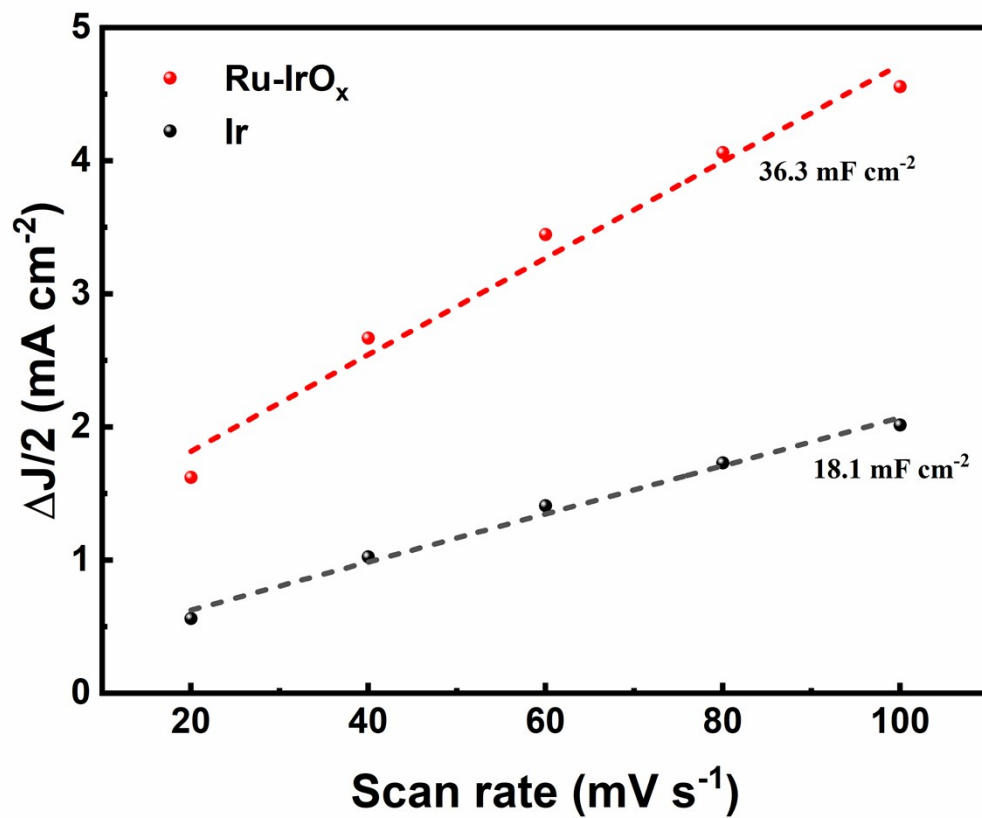

Fig. S13. Capacitive current against the scan rate and corresponding  $C_{dl}$  values estimated through linear fitting of the plots.

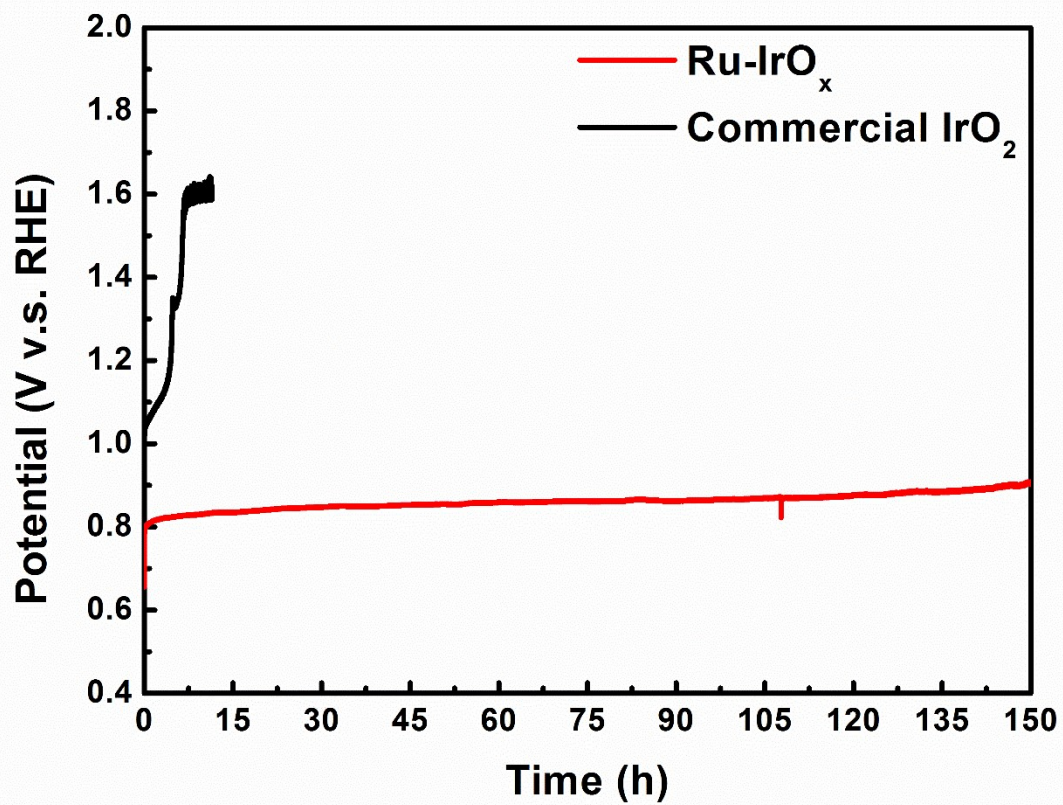

Fig. S14. Chronopotentiometric performance under constant current density of 10 mA cm<sup>-2</sup> up to 150 h.

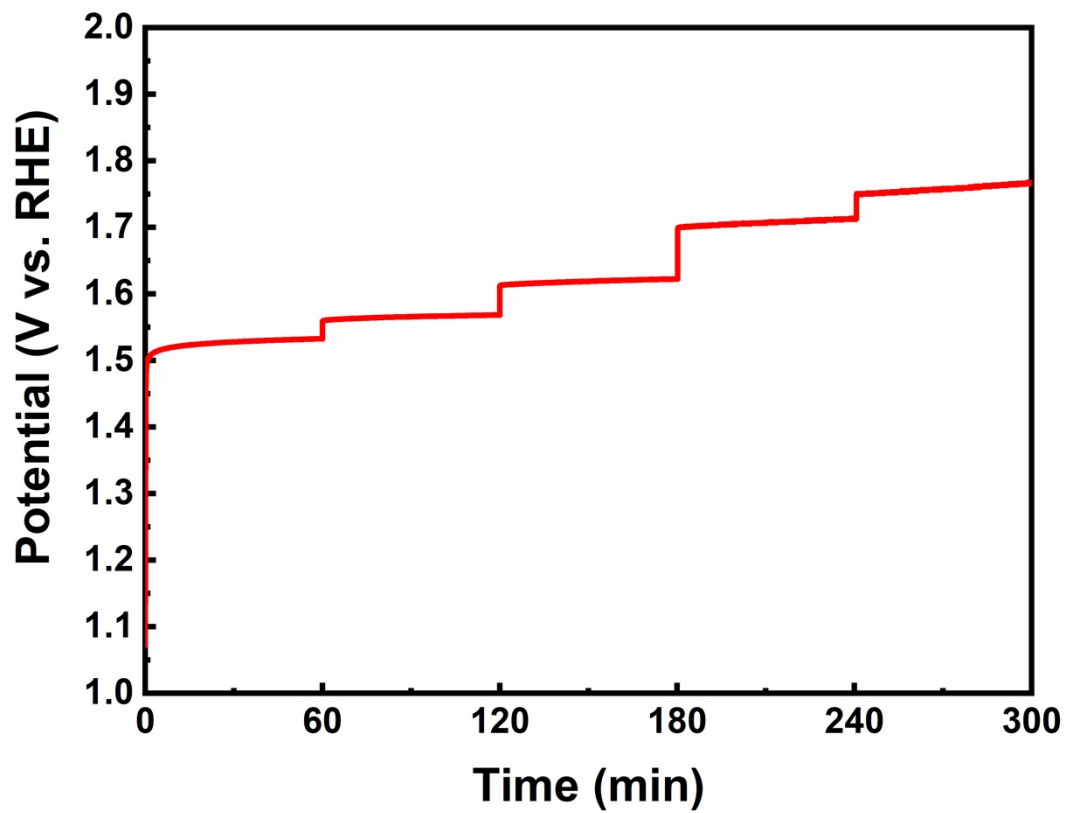

Fig. S15. Stable test at different current density from 10 to 100 mA cm<sup>-2</sup>.

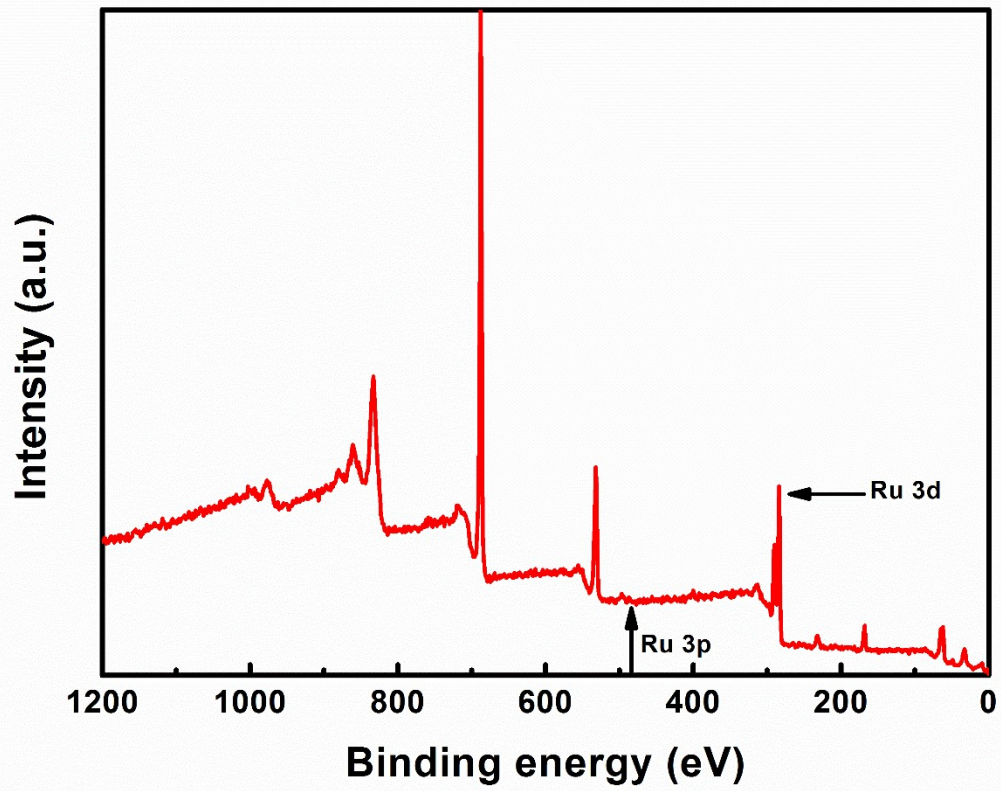

Fig. S16. XPS results after durable test.



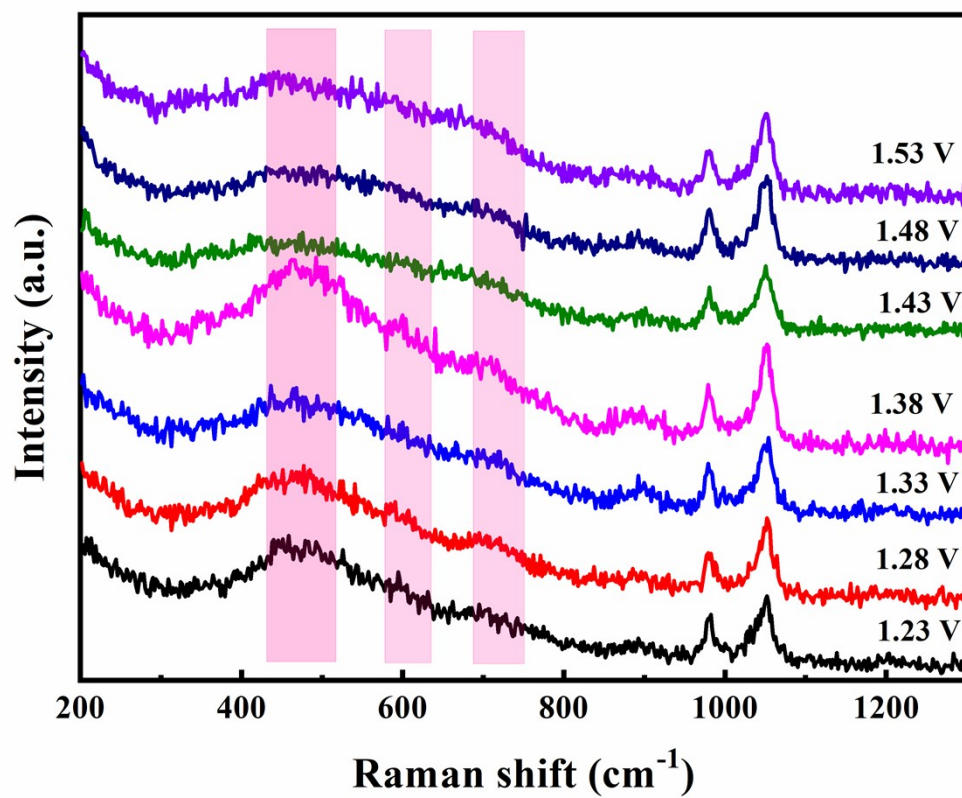

Fig. S18. In-situ Raman spectra of Ru-IrO<sub>x</sub> in the potential range of 1.53-1.23 V vs. RHE.

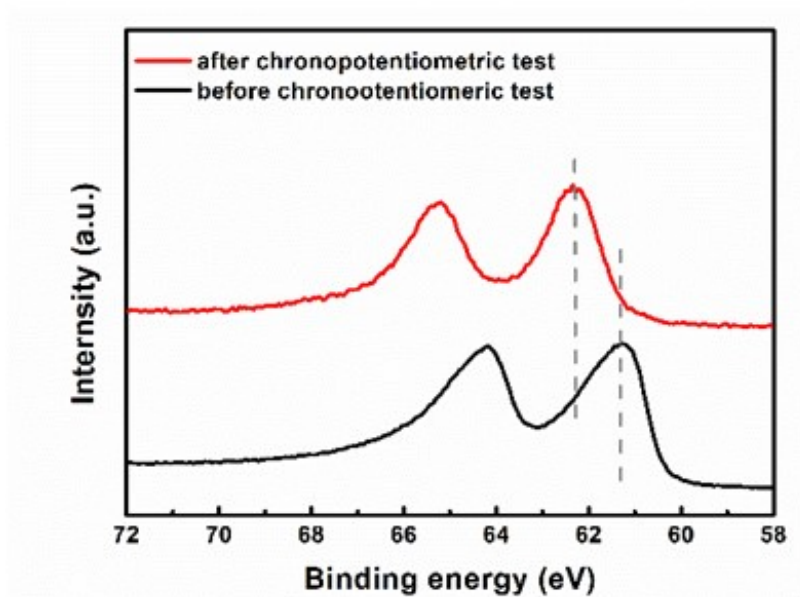

Fig. S19. High-resolution XPS results of Ir 4f for Ru-IrO<sub>x</sub> before and after chronopotentiometric test.



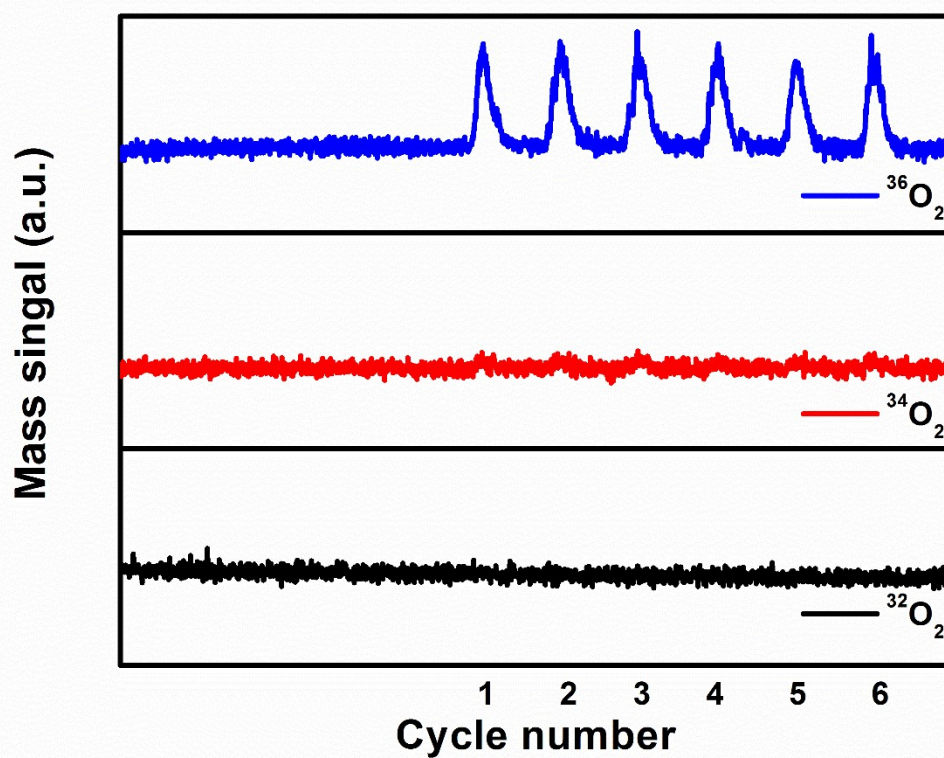

Fig. S20. DEMS signals of  $\text{O}_2$  products for Ru- $\text{IrO}_x$  clusters in the electrolyte using  $\text{H}_2^{18}\text{O}$  as the solvent during six times of CVs in the potential range of 1.11-1.66 vs. RHE.



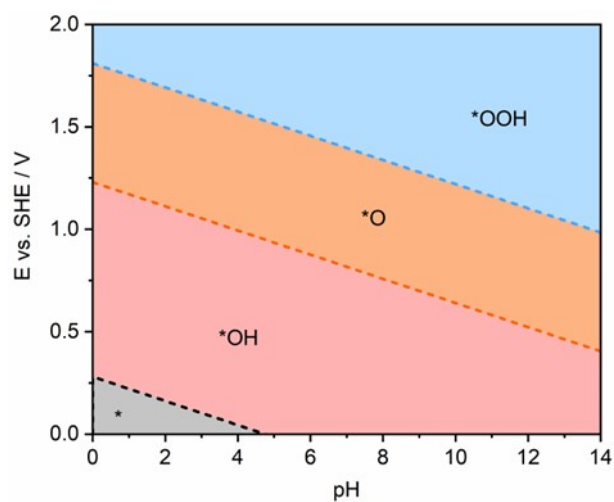

Fig. S21. The surface Pourbaix diagram of IrO<sub>2</sub>(110) surface. The stable phases are highlighted by pink for \*OH, orange for \*O and blue for \*OOH, respectively. labelled as on the pictures.

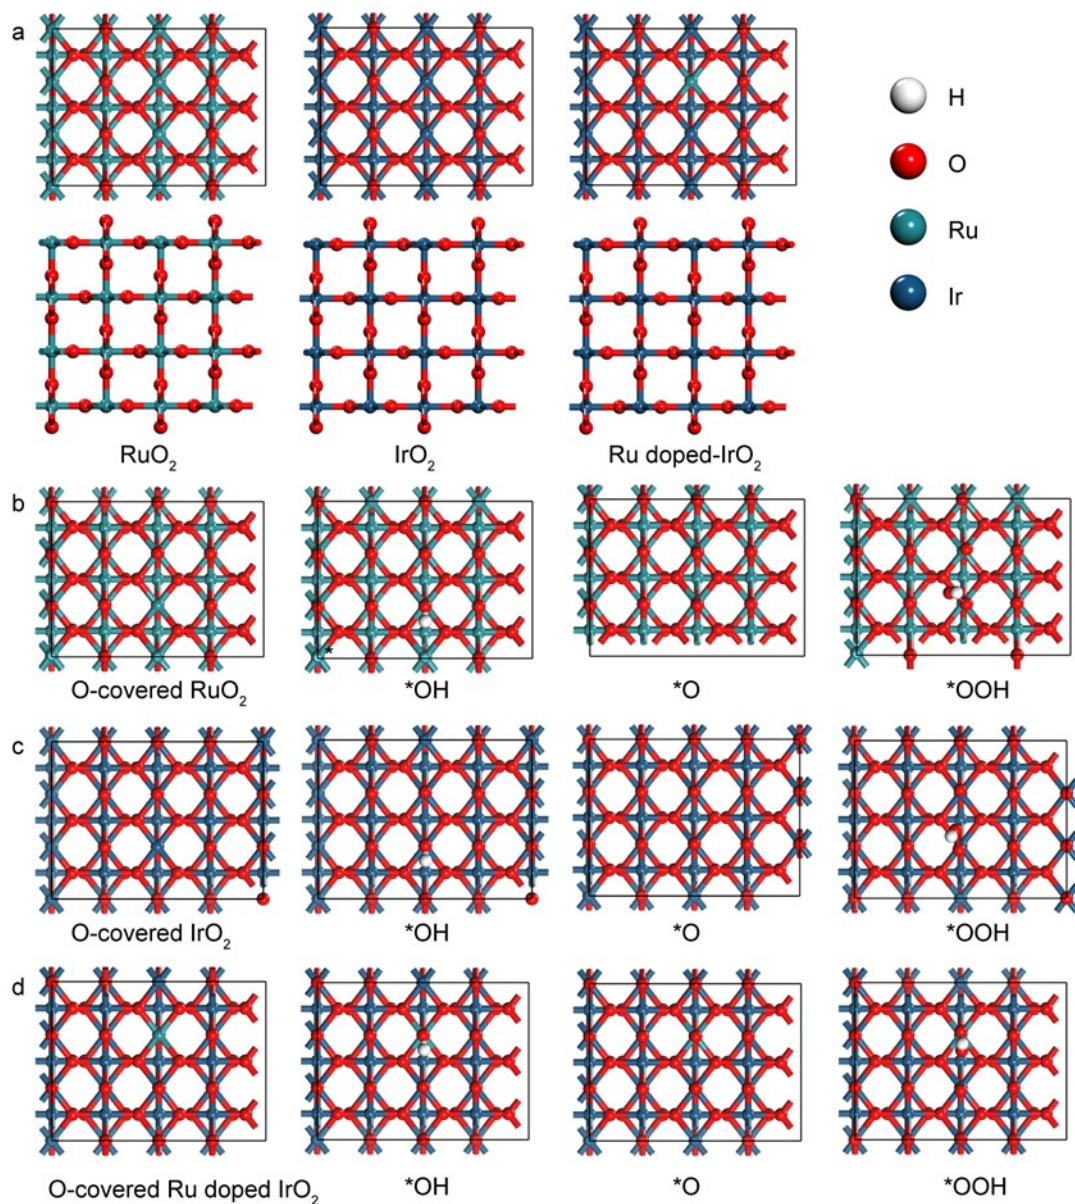

Fig. S22. (a) The top and side views of RuO<sub>2</sub>(110), IrO<sub>2</sub>(110) and Ru-doped IrO<sub>2</sub>(110) models. (b-c) Structures of O-covered RuO<sub>2</sub>(110), IrO<sub>2</sub>(110) and Ru-doped IrO<sub>2</sub>(110) and their \*OH, \*O and \*OOH intermediates of OER process.

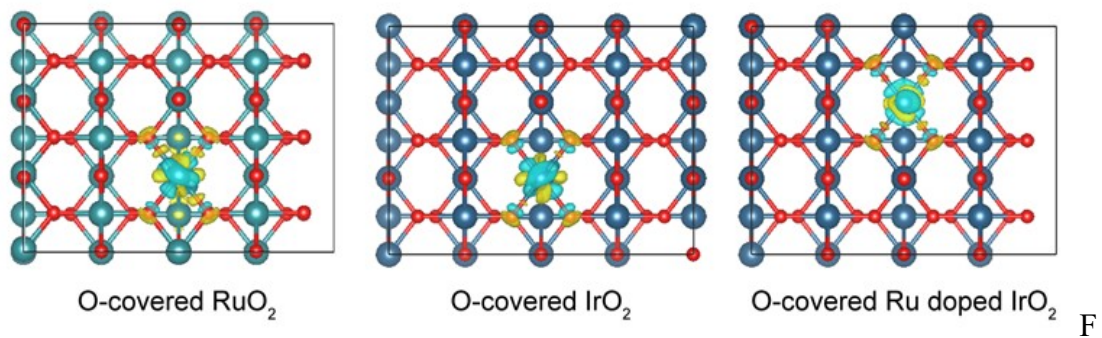

ig. S23. The charge-density difference of O-covered RuO<sub>2</sub>(110), IrO<sub>2</sub>(110) and Ru-doped IrO<sub>2</sub>(110). Yellow and cyan isosurfaces indicate the gain and loss of electrons. The isosurface level is set as 0.015 eVÅ<sup>-3</sup>.

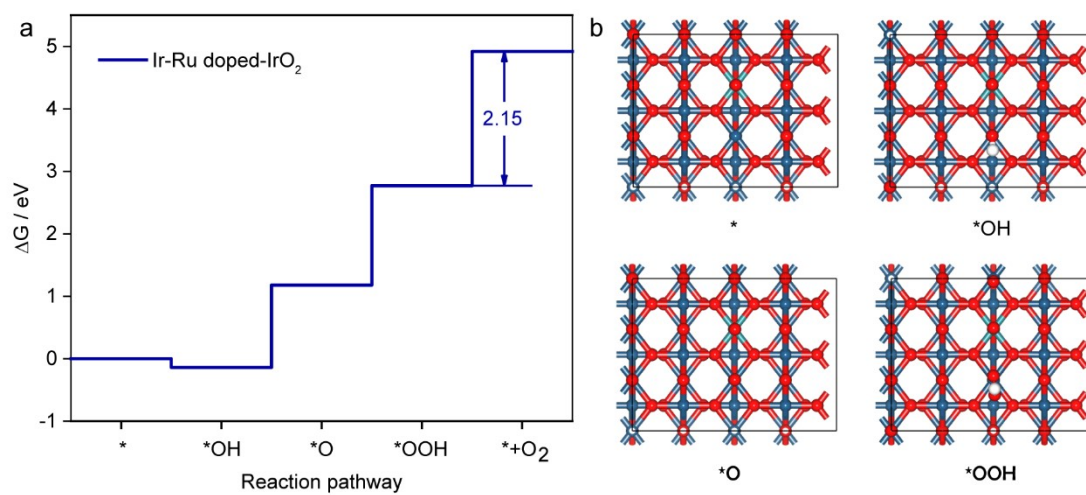

Fig. S24 (a) Gibbs free energy diagrams and (b) structures of intermediates for OER processes on Ir site of Ru-doped  $\text{IrO}_2(110)$ , which are simplified as Ir-Ru-doped  $\text{IrO}_2$  for clarity. Red, white and dark blue balls represent O, H and Ir atoms.

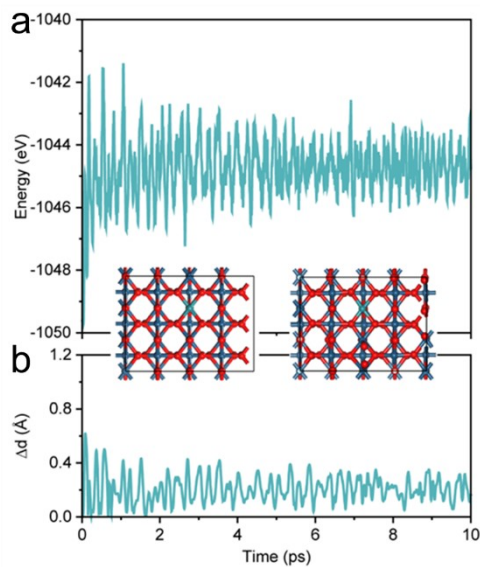

Fig. S25 The AIMD results of Ru doped IrO<sub>2</sub> at 500K for a total time of 10 ps and time step of 2fs under the canonical ensemble using Nosé thermostat. The total energy (a) and position changes ( $\Delta d$ , Å) (b) of Ru atom relative to the initial Ru during AIMD. The inset pictures show the structures of Ru doped IrO<sub>2</sub> before and after AIMD.

Table S1. Textural parameters of Ru-IrO<sub>x</sub>.

| Sample              | BET surface area                    | Micropore volume                         | Total pore volume                     |
|---------------------|-------------------------------------|------------------------------------------|---------------------------------------|
| Ru-IrO <sub>x</sub> | 22.2 m <sup>2</sup> g <sup>-1</sup> | 0.002761 cm <sup>3</sup> g <sup>-1</sup> | 0.055 cm <sup>3</sup> g <sup>-1</sup> |

Table S2. Ru and Ir content in Ru-IrO<sub>x</sub> clusters.

| Sample              | Ru (wt %) | Ir (wt %) |
|---------------------|-----------|-----------|
| Ru-IrO <sub>x</sub> | 4.67      | 55.15     |

Table S3. Structural parameters of Ru and reference samples extracted from the Ru K-edge EXAFS fitting

| <b>Sample</b>       | <b>bond type</b> | <b>CN</b> | <b>R (Å)</b> | <b><math>\sigma^2</math> (<math>10^{-3}\text{Å}^2</math>)<sup>**</sup></b> | <b>R factor</b> |
|---------------------|------------------|-----------|--------------|----------------------------------------------------------------------------|-----------------|
| Ru-foil             | Ru-Ru            | 12        | 2.67±0.01    | 2.4±0.5                                                                    | 0.015           |
| RuO <sub>2</sub>    | Ru-O             | 5.7±1.7   | 1.96±0.01    | 2.4±1.1                                                                    | 0.012           |
| Ru-IrO <sub>x</sub> | Ru-O             | 3.0±1.3   | 2.11±0.01    | 8.2±1.5                                                                    | 0.005           |

\*CN: coordination number;  $S_0^2$  was fixed to be 0.67 from Ru-foil.

\*\*  $\sigma^2$ : Debye–Waller factors



Table S4. Structural parameters of Ir and reference samples extracted from the Ir L<sub>3</sub>-edge EXAFS fitting.

| <b>Sample</b>       | <b>bond type</b> | <b>CN*</b> | <b>R (Å)</b> | <b>σ<sup>2</sup> (10<sup>-3</sup>Å<sup>2</sup>)**</b> | <b>R factor</b> |
|---------------------|------------------|------------|--------------|-------------------------------------------------------|-----------------|
| Ir foil             | Ir-Ir            | 12         | 2.71±0.01    | 2.9±0.4                                               | 0.001           |
| IrO <sub>2</sub>    | Ir-O             | 6.2±0.4    | 2.02±0.01    | 4.3±0.6                                               | 0.009           |
| Ru-IrO <sub>x</sub> | Ir-O             | 4.3±0.5    | 2.04±0.01    | 4.1±1.3                                               | 0.014           |
| Ir                  | Ir-O             | 2.7±0.5    | 2.02±0.02    | 6.9±0.2                                               | 0.017           |

\*CN: coordination number; S<sub>0</sub><sup>2</sup> was fixed to be 0.70 from Ir-foil.

\*\* σ<sup>2</sup>: Debye–Waller factors

## Reference

- [1] G. Kresse, J. Furthmüller, *Phys. Rev. B* **1996**, 54, 11169.
- [2] J. P. Perdew, K. Burke, M. Ernzerhof, *Phys. Rev. Lett.* **1996**, 77, 3865.
- [3] P. E. Blöchl, *Phys. Rev. B* **1994**, 50, 17953.
- [4] S. Grimme, J. Antony, S. Ehrlich, H. Krieg, *J. Chem. Phys.* **2010**, 132, 154104.
- [5] a) A. A. Peterson, F. Abild-Pedersen, F. Studt, J. Rossmeisl, J. K. Nørskov, *Energy Environ. Sci.* **2010**, 3, 1311; b) J. K. Nørskov, J. Rossmeisl, A. Logadottir, L. Lindqvist, J. R. Kitchin, T. Bligaard, H. Jónsson, *J. Phys. Chem. B* **2004**, 108, 17886.
- [6] J. K. Nørskov, T. Bligaard, A. Logadottir, J. R. Kitchin, J. G. Chen, S. Pandelov, U. Stimming, *J. Electrochem. Soc.* **2005**, 152, J23.
